# Supplementary material for: Nucleocytoplasmic Shuttling of Histone Deacetylase 9 Controls Activity-Dependent Thalamocortical Axon Branching
Source: PubMed Central journal article supplement (PMC5519695; doi:10.1038/s41598-017-06243-7), 2017-07-20
Supplement: 41598_2017_6243_MOESM1_ESM.pdf [file 41598_2017_6243_MOESM1_ESM.pdf]

## Supplementary Information

### Nucleocytoplasmic Shuttling of Histone Deacetylase 9 Controls Activity-Dependent Thalamocortical Axon Branching

Ricardo Alchini, Haruka Sato, Naoyuki Matsumoto, Tomomi Shimogori, Noriyuki Sugo, Nobuhiko Yamamoto

Supplementary Figure 1. Representative thalamic neurons at 14 DIV (control) or 14 DIV (TTX-treated). HDAC9-EGFP distribution in cells can be compared to nuclear staining with DAPI. Arrows refer to the position of the same cell at a given time point. Scale bar, 10  $\mu\text{m}$ .

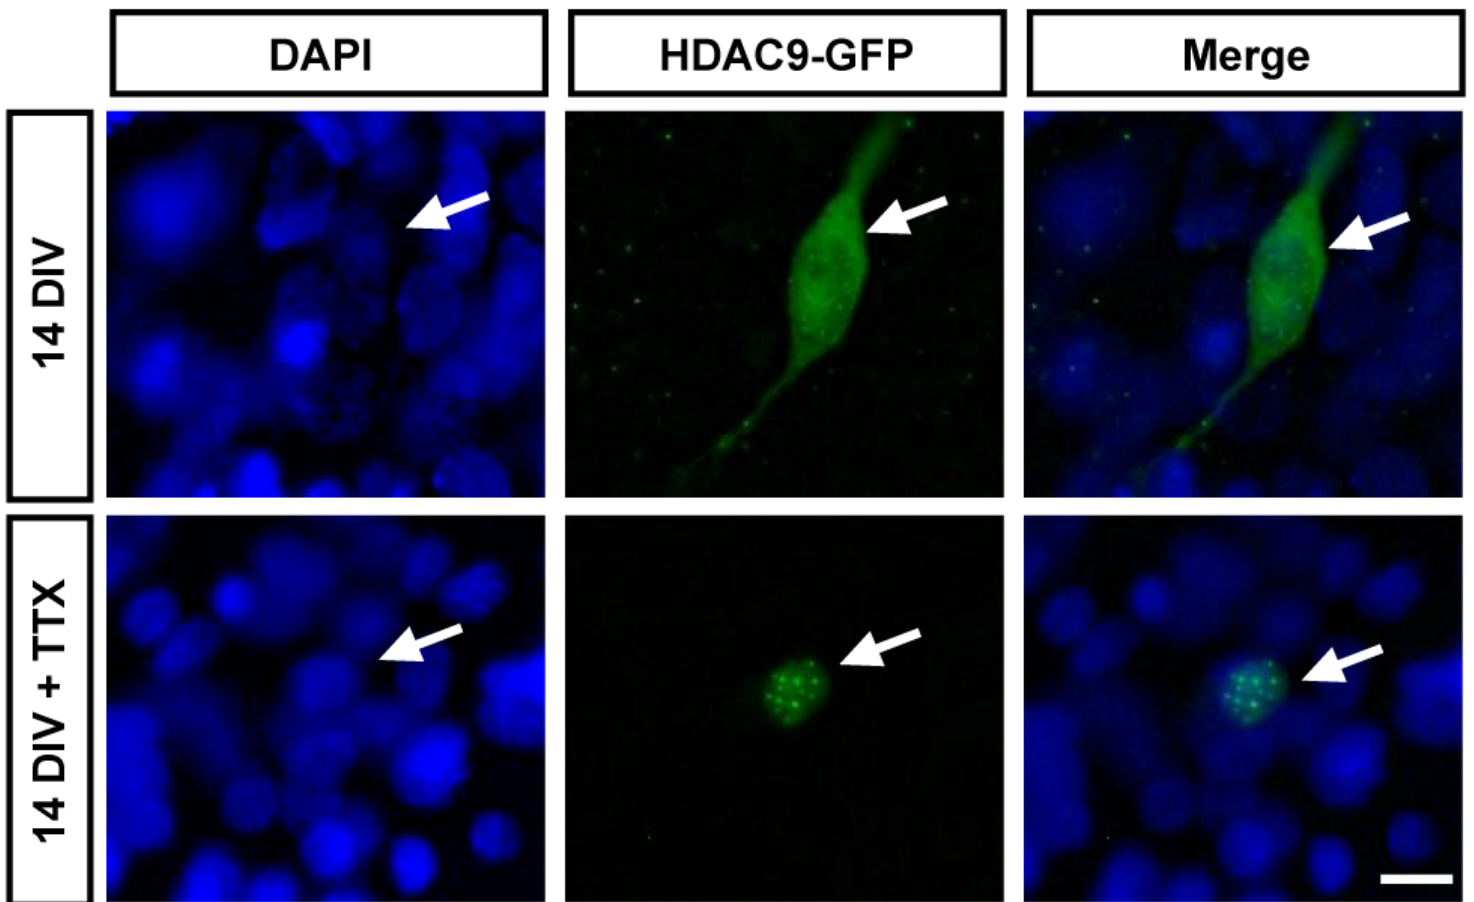

Supplementary Figure 1. Representative thalamic neurons at 14 DIV (control) or 14 DIV (TTX-treated). HDAC9-EGFP distribution in cells can be compared to nuclear staining with DAPI. Arrows refer to the position of the same cell at a given time point. Scale bar, 10  $\mu$ m.
